# Supplementary material
Source: PubMed Central journal article supplement (PMC5575974)
Supplement: NIHMS891934-supplement-Manuscript_File.pdf [file NIHMS891934-supplement-Manuscript_File.pdf]

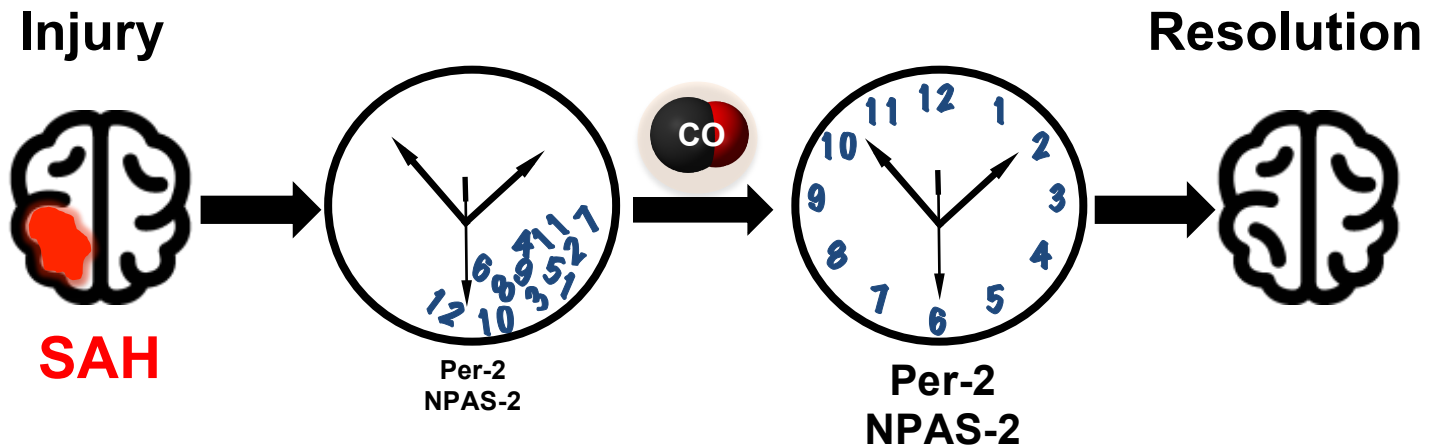

**Graphic Abstract:** Subarachnoid hemorrhage results in acute injury that interrupts normal circadian rhythm with decreased expression of the clock genes NPAS-2 and Per-2. Administration of safe amounts of carbon monoxide (CO) restores normal rhythm and clock gene expression that corresponds with less inflammation and more effective resolution at the site of injury.
